# Supplementary material for: Role of the Bacterial Amyloid-like Hfq in Fluoroquinolone Fluxes
Source: MDPI journal article supplement (doi:10.3390/microorganisms12010053), 2023-12-28
Supplement: s1 [file s1]

**Sup Fig. S1:** Normal distribution of bacterial populations based on single cell analysis

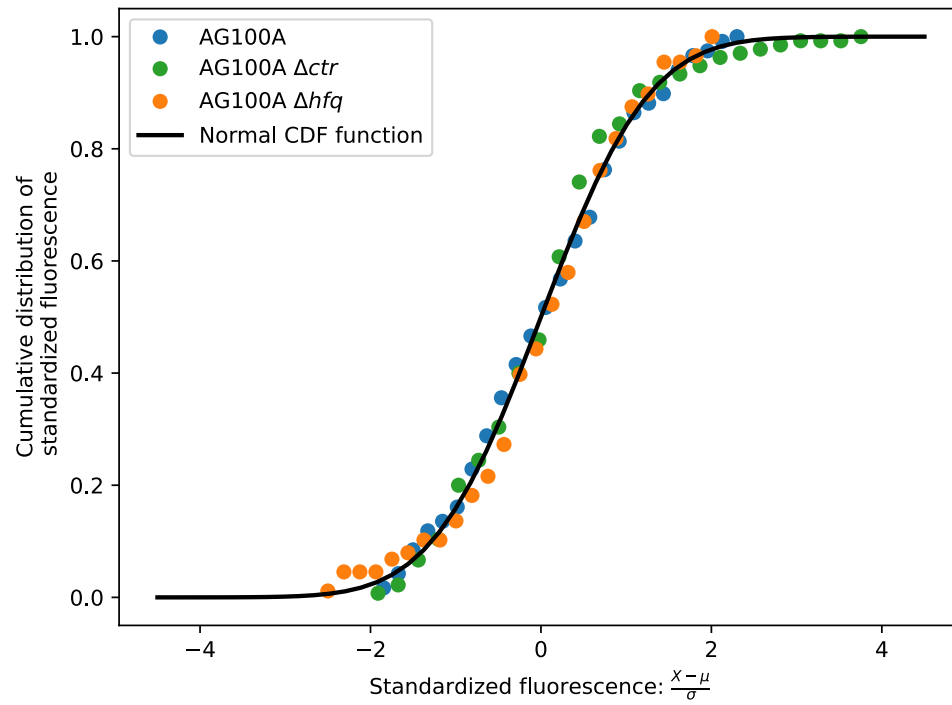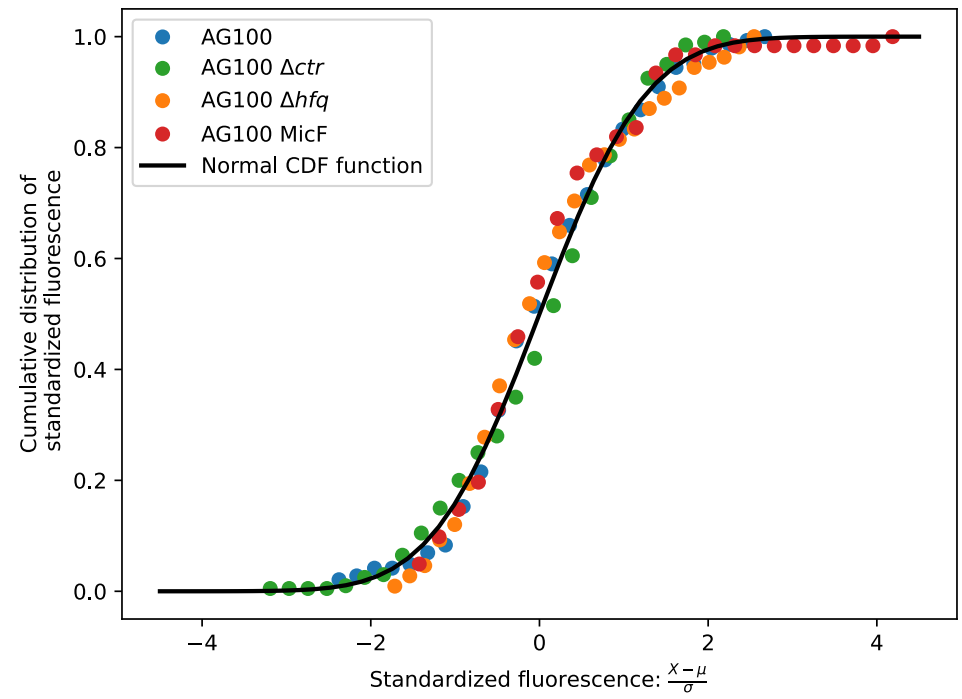

**Sup Fig. S2:** CIP accumulation at the single cell level with lower exposure to UV

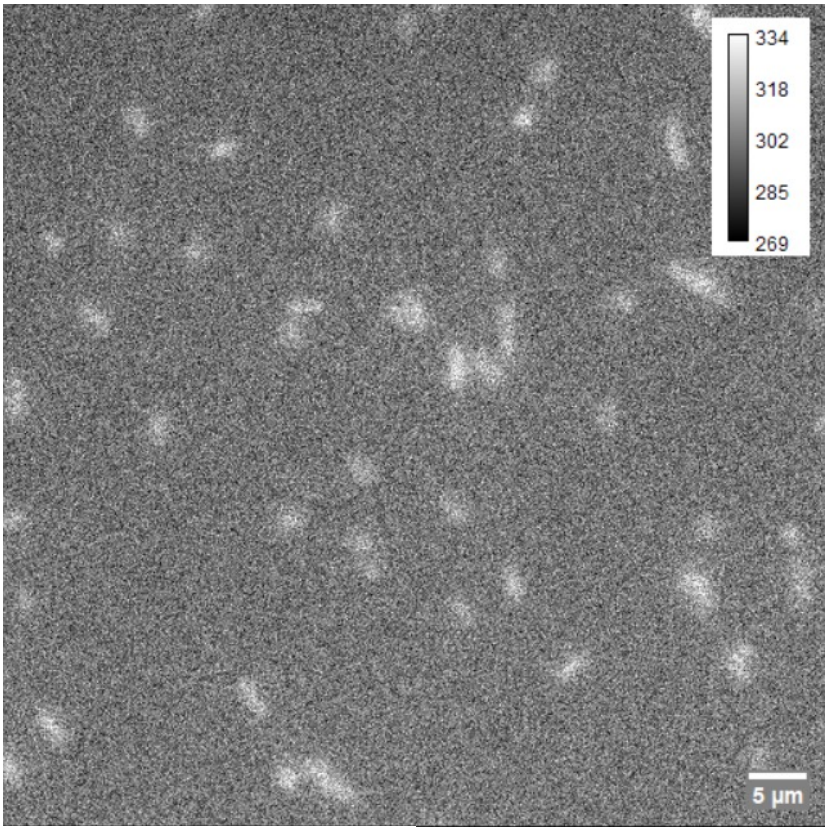

| AG100 ΔHfq 5min  |       |
|------------------|-------|
| mean fluorecence | std   |
| 315              | 10,61 |

Mean fluorecence : 315  
Standard deviation : 10,61

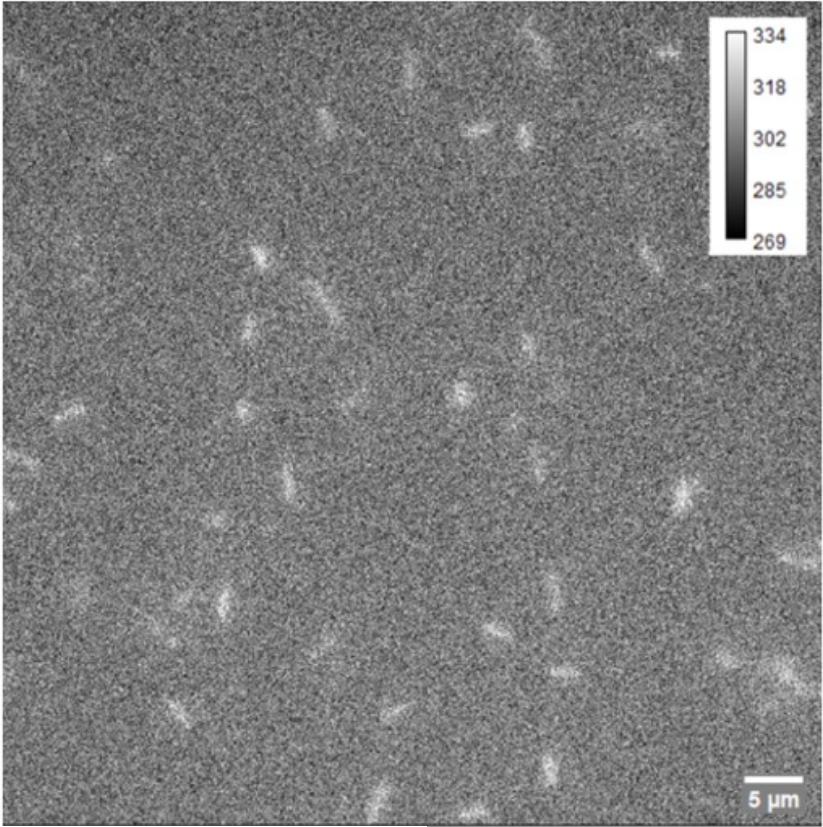

| AG100 ΔHfq 15min |       |
|------------------|-------|
| mean fluorecence | std   |
| 312,1            | 13,64 |

Mean fluorecence : 312,1  
Standard deviation : 13,64

**AG100**  
 **$\Delta hfq$**   
**+ CIP**  
**15 min**

Overlay of Syto 9 (green) and PI (red) staining

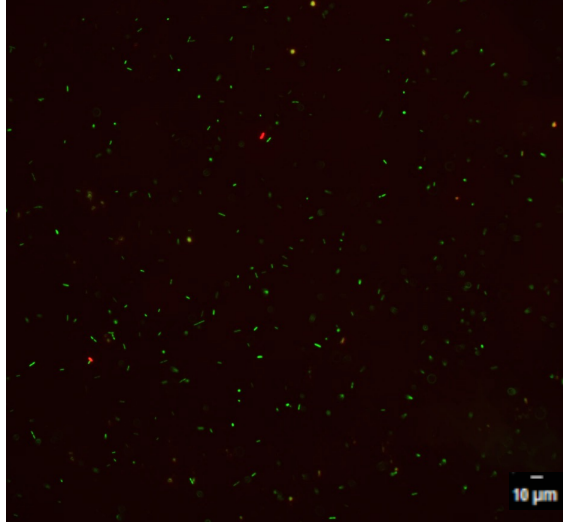

PI staining

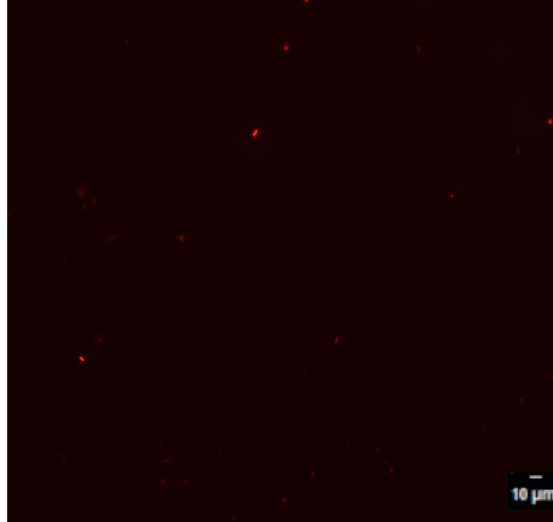

**AG100**  
 **$hfq^+$**   
**+ CIP**  
**15 min**

Overlay of Syto 9 (green) and PI (red) staining

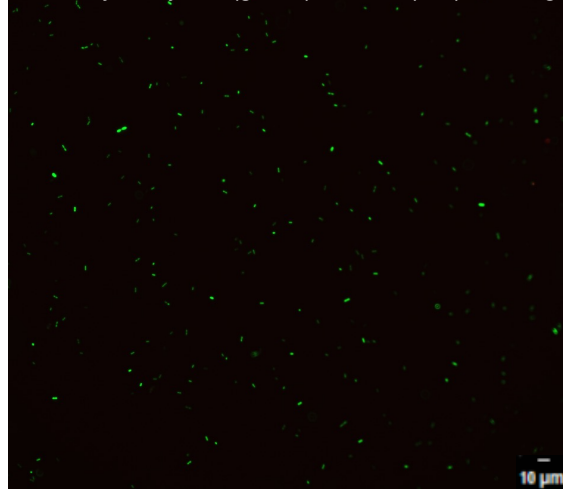

PI staining

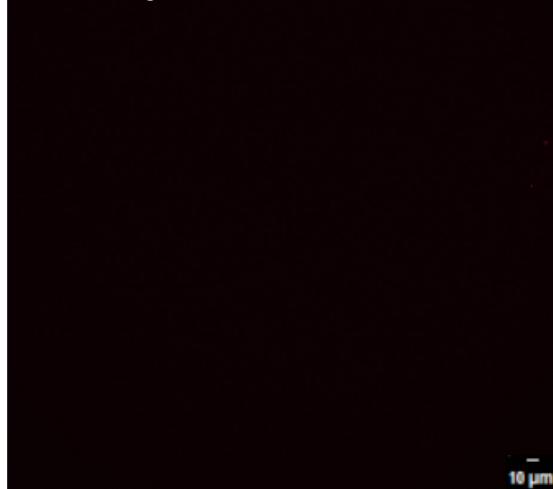

**Sup Fig S3:** *Left:* Evaluation of AG100  $\Delta hfq$  strain survival using Live/Dead staining. *Right:* Plating of AG100  $\Delta hfq$  and WT strain after 7 min of incubation with CIP (only one example of the triplicates is shown). Note that AG100  $\Delta hfq$  colonies are smaller than those of AG100.

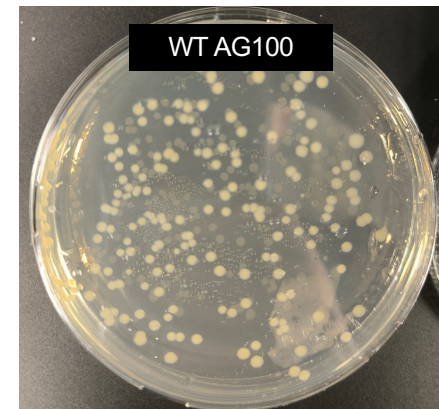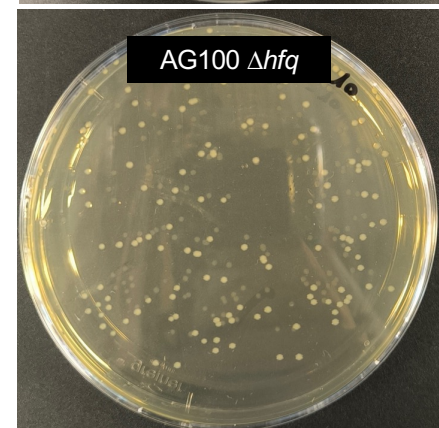

**Sup table S1: Ciprofloxacin accumulation values at the single cell level in bacteria**  
(Std = standard deviation)

|            | AG100 WT | 140 bacteria | AG100 ΔCTR | 255 bacteria | AG100 ΔHfq | 104 bacteria | AG100/pBRpLacMicF | 54 bacteria | AG100A WT | 114 bacteria | AG100A ΔCTR | 131 bacteria | AG100A ΔHfq | 84 bacteria |
|------------|----------|--------------|------------|--------------|------------|--------------|-------------------|-------------|-----------|--------------|-------------|--------------|-------------|-------------|
| Time (min) | mean     | std          | mean       | std          | mean       | std          | mean              | std         | mean      | std          | mean        | std          | mean        | std         |
| 3          | 1,161    | 2,988        | 1,027      | 3,301        | 0,754      | 3,310        | -0,548            | 2,859       | -9,909    | 11,192       | 4,423       | 35,482       | -18,626     | 35,074      |
| 5          | 1,949    | 3,637        | 1,594      | 3,991        | 1,409      | 4,135        | -0,763            | 2,844       | 1,218     | 12,936       | 25,807      | 43,015       | 4,547       | 43,402      |
| 7          | 3,193    | 4,464        | 2,846      | 4,452        | 3,006      | 5,650        | -0,088            | 2,902       | 14,594    | 16,574       | 48,231      | 44,866       | 33,900      | 48,209      |
| 9          | 5,242    | 5,273        | 3,496      | 6,046        | 3,820      | 6,678        | 1,297             | 3,007       | 26,088    | 19,657       | 70,631      | 47,235       | 66,250      | 52,926      |
| 11         | 7,009    | 6,286        | 5,930      | 8,222        | 4,034      | 7,662        | 0,641             | 3,856       | 37,733    | 22,870       | 93,309      | 51,604       | 106,319     | 66,011      |
| 13         | 8,369    | 7,812        | 8,168      | 10,269       | 3,617      | 7,753        | 1,231             | 3,154       | 48,555    | 26,392       | 110,477     | 55,759       | 151,431     | 80,179      |
| 15         | 9,752    | 8,643        | 12,216     | 13,146       | 4,271      | 8,828        | 2,115             | 3,638       | 55,767    | 27,848       | 127,028     | 57,196       | 184,511     | 85,157      |
| 17         | 11,117   | 9,195        | 16,583     | 14,607       | 3,600      | 9,054        | 4,926             | 3,962       | 63,241    | 30,031       | 143,207     | 58,804       | 208,047     | 90,245      |
| 19         | 13,485   | 10,128       | 20,451     | 15,142       | 2,789      | 9,510        | 4,243             | 3,834       | 68,465    | 30,731       | 159,668     | 62,594       | 230,670     | 92,388      |
| 21         | 15,011   | 10,949       | 24,995     | 15,310       | 3,772      | 10,228       | 5,545             | 4,634       | 73,094    | 33,076       | 172,493     | 65,076       | 244,343     | 96,351      |
| 23         | 16,861   | 12,089       | 28,581     | 15,256       | 3,163      | 10,220       | 6,441             | 4,453       | 77,750    | 34,519       | 184,490     | 68,124       | 255,428     | 100,044     |
| 25         | 17,481   | 12,306       | 32,106     | 15,583       | 2,659      | 10,916       | 6,129             | 5,097       | 80,365    | 35,315       | 192,716     | 71,212       | 261,737     | 100,563     |
| 27         | 19,470   | 12,760       | 36,191     | 14,926       | 3,943      | 11,302       | 8,014             | 5,432       | 81,507    | 35,291       | 195,708     | 74,158       | 290,037     | 103,548     |
| 30         | 20,203   | 13,348       | 38,716     | 15,435       | 2,445      | 11,485       | 8,952             | 4,186       | 83,071    | 36,782       | 199,767     | 76,520       | 308,009     | 105,757     |
